# Supplementary material for: Qualitative and Quantitative Analysis of Edible Bird’s Nest Based on Peptide Markers by LC-QTOF-MS/MS
Source: MDPI journal article supplement (doi:10.3390/molecules27092945), 2022-05-05
Supplement: s1 [file s1]

## Supplementary Materials

### Qualitative and quantitative analysis of Edible Bird's Nest based on peptide markers by LC-QTOF-MS/MS

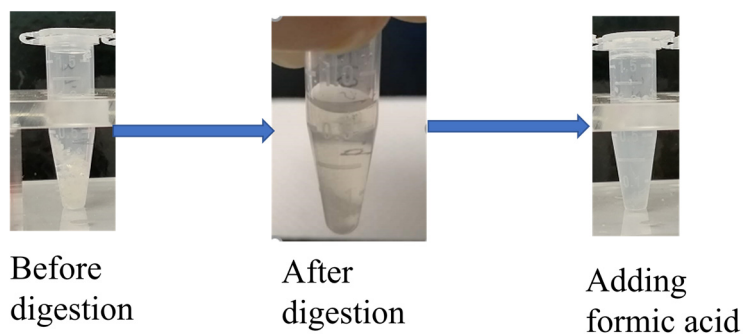

**Figure S1.** Edible bird's nest is fully soluble after adding formic acid.

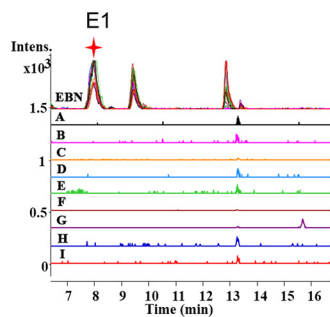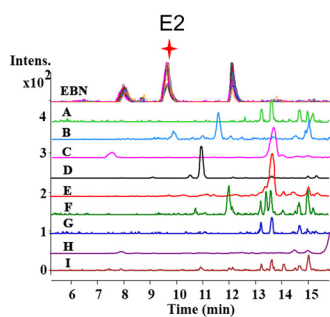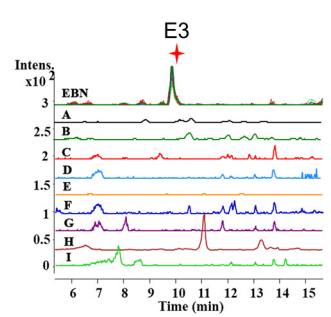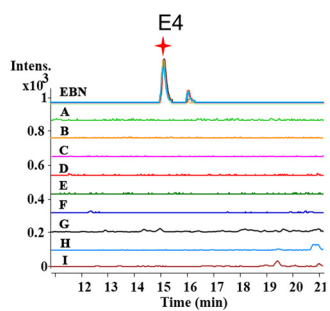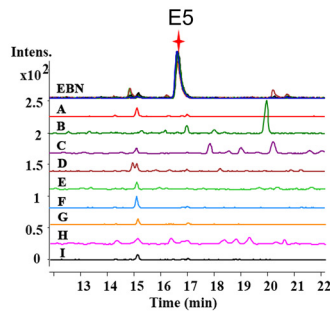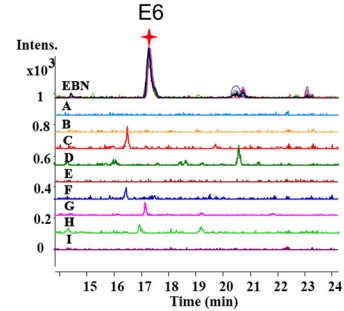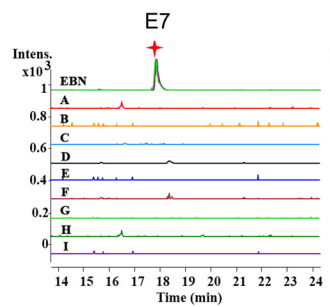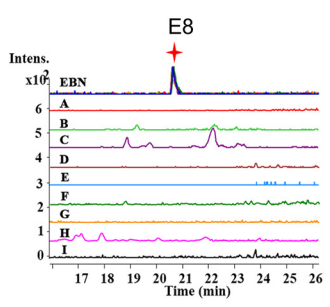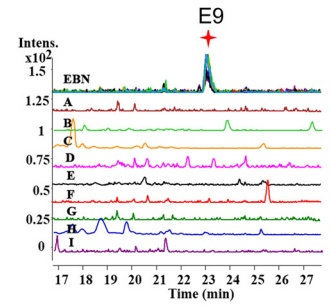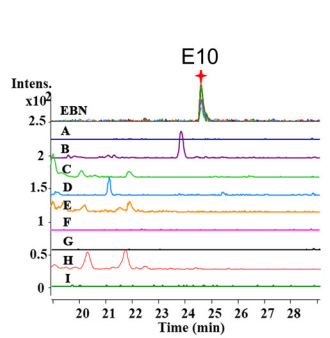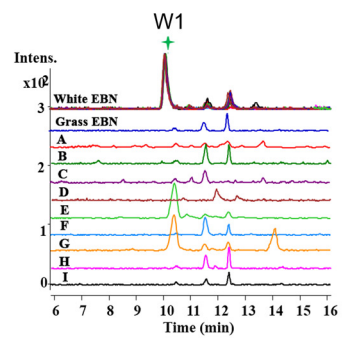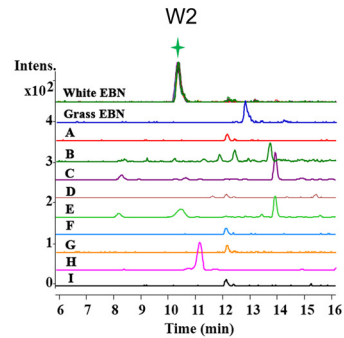

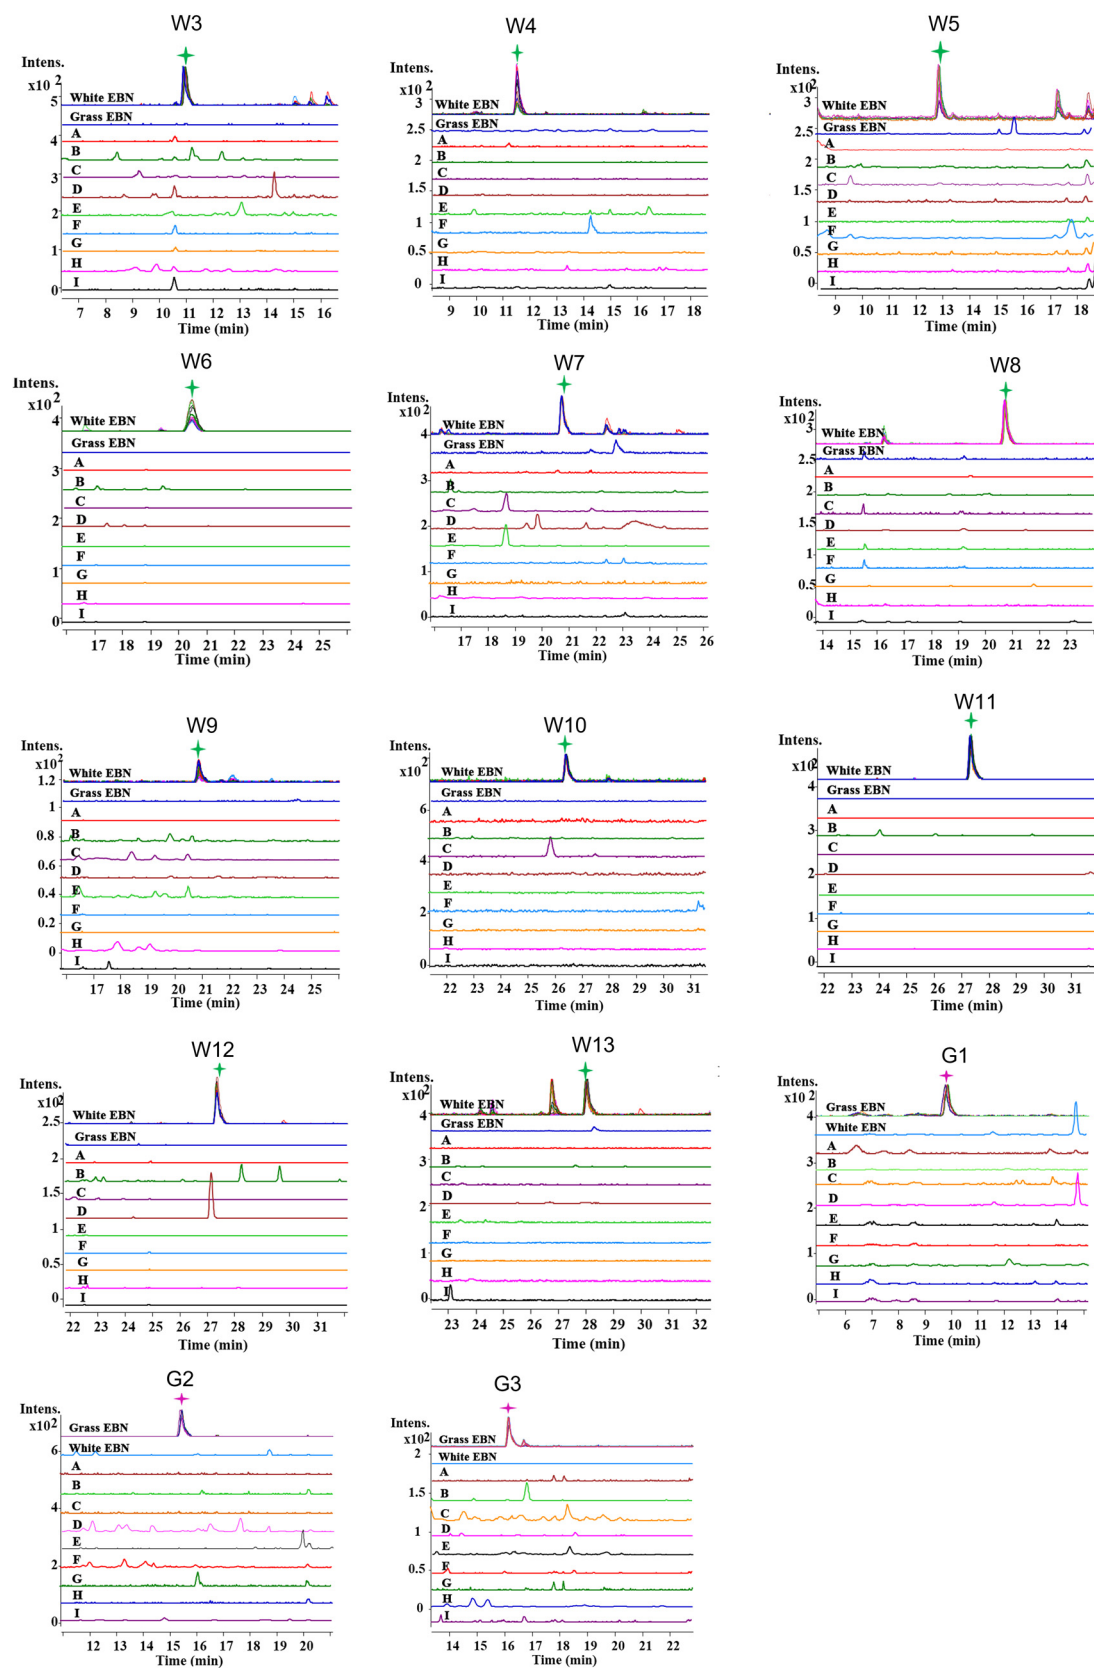

**Figure S2.** Extracted ion chromatograms (EIC) of selected peptide markers specific to EBN, white EBN and grass EBN in typical batches of digested EBN (overlapped) and related adulterants. The adulterants include agar (A), egg white (B), gelatin (C), cow milk (D), pork skin (E), rice flour (F), starch (G), swim

bladder (H) and tremella fungus (I).

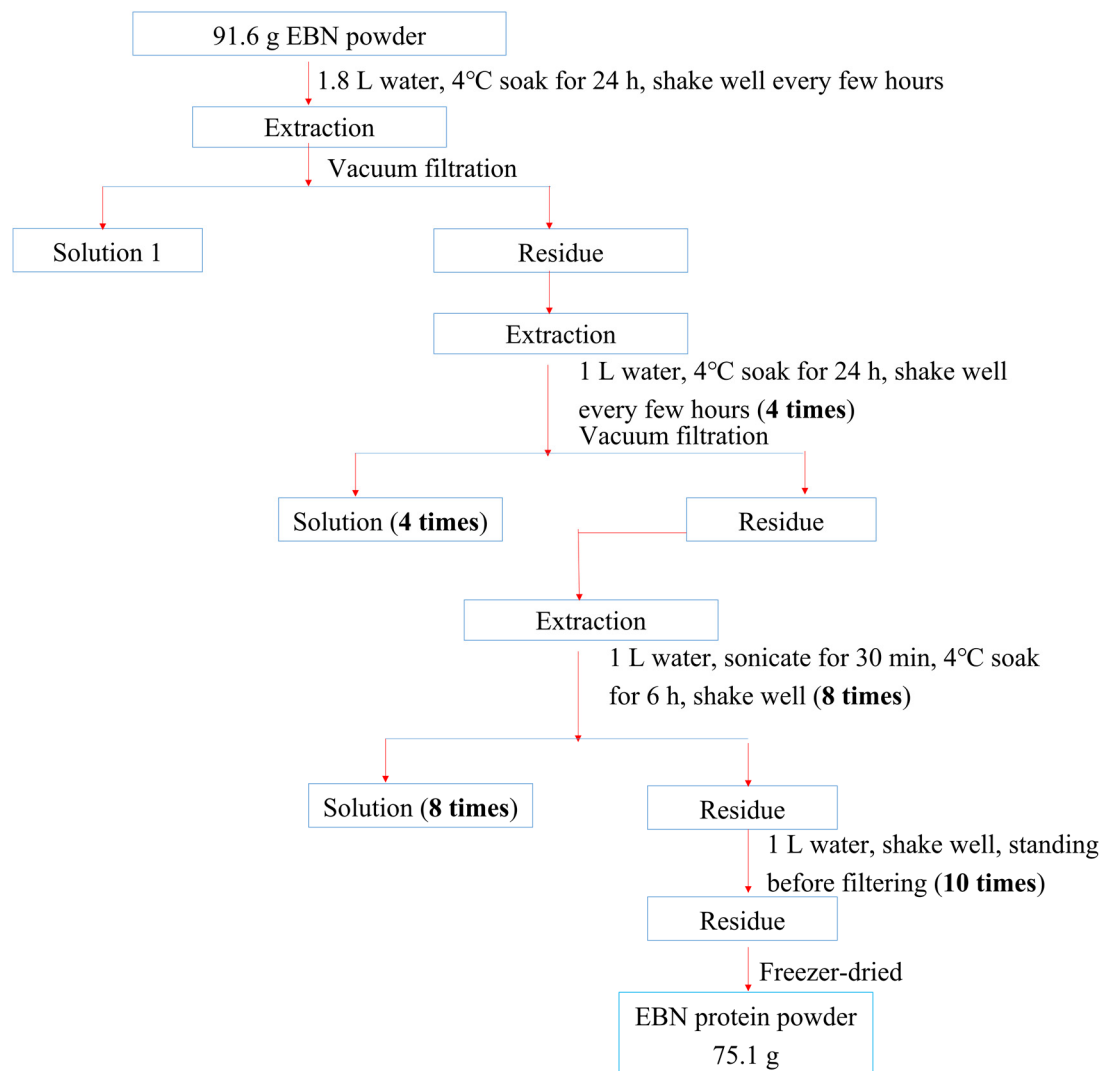

**Figure S3.** Flowchart for homemade EBN total protein.

**Table S1.** peak areas of peptide markers in the same sample.

| Marker No. | Mass to charge<br>(m/z) | Retention<br>time (min) | Peak area in raw<br>material | Peak area in<br>supernatant | Peak area in<br>residue |
|------------|-------------------------|-------------------------|------------------------------|-----------------------------|-------------------------|
| W2         | 454.7018                | 10.24                   | 3116011                      | 1131499                     | 7476481                 |
| W4         | 277.6512                | 11.50                   | 21259                        | 107630                      | 157269                  |
| E5         | 404.1986                | 16.65                   | 107159                       | 178887                      | 226653                  |
| W6         | 321.7031                | 20.50                   | 1824927                      | 1005215                     | 1400215                 |
| W9         | 468.7439                | 20.78                   | 2877560                      | 1526356                     | 2610093                 |
| W11        | 391.7427                | 27.42                   | 5808                         | 9038                        | 8829                    |
